# Supplementary material for: Identification of consensus biomarkers for predicting non-genotoxic hepatocarcinogens
Source: PubMed Central journal article supplement (PMC5259716; doi:10.1038/srep41176), 2017-01-24
Supplement: srep41176-s1.pdf [file srep41176-s1.pdf]

## Supplementary Information files

### Supplementary Figure S1. The number of common biomarkers of published studies

|                         |                           |                    |                          |                           |                           |                         |                          |                            |
|-------------------------|---------------------------|--------------------|--------------------------|---------------------------|---------------------------|-------------------------|--------------------------|----------------------------|
| Fielden et al.<br>2007  | 22                        |                    |                          |                           |                           |                         |                          |                            |
| Fielden et al.<br>2011  | 7                         | 90                 |                          |                           |                           |                         |                          |                            |
| Uehara et al.<br>2011   | 1                         | 0                  | 82                       |                           |                           |                         |                          |                            |
| Liu et al.<br>2011      | 1                         | 0                  | 2                        | 35                        |                           |                         |                          |                            |
| Eichner et al.<br>2014  | 0                         | 0                  | 3                        | 2                         | 45                        |                         |                          |                            |
| Tung & Cheng<br>2014    | 0                         | 0                  | 0                        | 0                         | 0                         | 2                       |                          |                            |
| Yamada et al.<br>2015   | 0                         | 0                  | 0                        | 1                         | 1                         | 0                       | 42                       |                            |
| Masayuki et al.<br>2016 | 0                         | 0                  | 1                        | 1                         | 5                         | 0                       | 0                        | 106                        |
|                         | Fielden et<br>al.<br>2007 | Liu et al.<br>2011 | Uehara et<br>al.<br>2011 | Fielden et<br>al.<br>2011 | Eichner et<br>al.<br>2014 | Tung &<br>Cheng<br>2014 | Yamada<br>et al.<br>2015 | Masayuki<br>et al.<br>2016 |

**Supplementary Figure S2. The number of common DEGs from the microarray datasets**

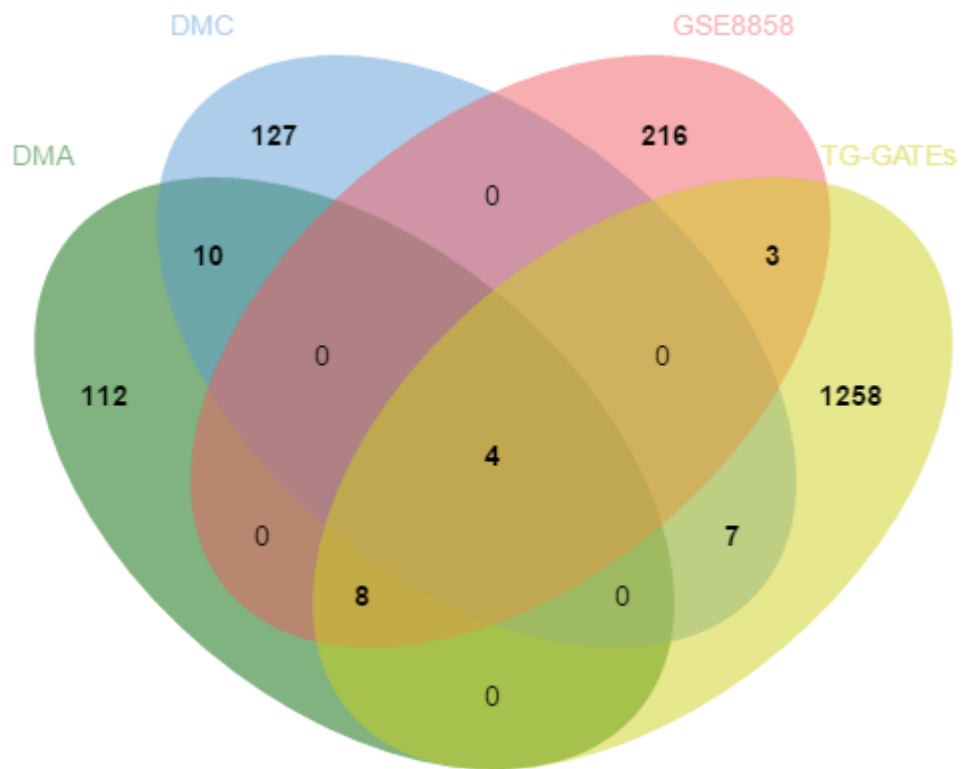

## **Supplementary Datasets**

**Supplementary Table S1. Chemical without inconsistent classification**

**Supplementary Table S2. The average values of consensus biomarkers for four microarray datasets**

**Supplementary Table S3. The dosage and classification of inconsistently classified chemicals**
