# Supplementary material for: Identification of consensus biomarkers for predicting non-genotoxic hepatocarcinogens
Source: PubMed Central journal article supplement (PMC5259716; doi:10.1038/srep41176), 2017-01-24
Supplement: srep41176-s4.pdf [file srep41176-s4.pdf]

Supplementary Table S3. The dosage and classification of inconsistently classified chemicals

| Chemical                            | DrugMatrixCodelink | DrugMatrixAffymetrix |
|-------------------------------------|--------------------|----------------------|
| 17-methyltestosterone               | 2000 mg/kg         |                      |
| 2,3,7,8-tetrachlorodibenzo-p-dioxin | 0.02 mg/kg         | 0.02 mg/kg           |
| Anastrozole                         | 400 mg/kg          | 400 mg/kg            |
| Beta-naphthoflavone                 | 1500 mg/kg         | 1500 mg/kg           |
| Bezafibrate                         | 617 mg/kg          | 617 mg/kg            |
| Bis(2-ethylhexyl)phthalate          | 1000 mg/kg         |                      |
| Bupropion                           | 895 mg/kg          |                      |
| Carbimazole                         | 400 mg/kg          | 400 mg/kg            |
| Carbon tetrachloride                | 3178 mg/kg         | 1175 mg/kg           |
| Chloroform                          | 600 mg/kg          | 600 mg/kg            |
| Clofibrate                          | 500 mg/kg          |                      |
| Coumarin                            |                    |                      |
| Dipyron                             | 1636 mg/kg         |                      |
| Estriol                             | 313 mg/kg          | 313 mg/kg            |
| Ethinylestradiol                    | 1480 mg/kg         | 1480 mg/kg           |
| Ethionine                           |                    |                      |
| Ethisterone                         | 1500 mg/kg         | 1500 mg/kg           |
| Ethylestrenol                       | 390 mg/kg          |                      |
| Fenbendazole                        | 375 mg/kg          | 375 mg/kg            |
| Fenofibrate                         | 215 mg/kg          |                      |
| Fluconazole                         | 394 mg/kg          | 394 mg/kg            |
| Gemfibrozil                         | 700 mg/kg          | 700 mg/kg            |
| Hexochlorobenzene                   |                    |                      |
| Lovastatin                          | 1500 mg/kg         | 1500 mg/kg           |
| Methapyrilene                       | 100 mg/kg          |                      |
| Mifepristone                        | 300 mg/kg          | 300 mg/kg            |
| Monocrotaline                       |                    |                      |
| Nafenopin                           | 338 mg/kg          | 338 mg/kg            |
| Norethindrone                       | 375 mg/kg          |                      |
| Norethindrone acetate               | 125 mg/kg          | 125 mg/kg            |
| Oxfendazole                         | 1500 mg/kg         | 1500 mg/kg           |
| Oxymetholone                        | 1170 mg/kg         | 1170 mg/kg           |
| Pentobarbital                       | 70 mg/kg           |                      |
| Phenobarbital                       | 80 mg/kg           | 54 mg/kg             |
| Pirinixic acid                      | 364 mg/kg          | 364 mg/kg            |
| Pravastatin                         | 1200 mg/kg         |                      |
| Prednisolone                        | 184 mg/kg          | 184 mg/kg            |
| Progesterone                        | 164 mg/kg          | 164 mg/kg            |
| Safrole                             | 488 mg/kg          | 488 mg/kg            |
| Spironolactone                      | 300 mg/kg          | 300 mg/kg            |
| Stanozolol                          | 150 mg/kg          |                      |
| Testosterone                        | 375 mg/kg          |                      |
| Thioacetamide                       | 200 mg/kg          |                      |
| 1,1-dichloroethene                  | 600 mg/kg          | 600 mg/kg            |
| 3-methylcholanthrene                | 300 mg/kg          | 300 mg/kg            |
| 6-mercaptopurine                    | 25 mg/kg           |                      |
| Acarbose                            |                    |                      |

|                        |             |            |
|------------------------|-------------|------------|
| Acetazolamide          | 250 mg/kg   |            |
| Acyclovir              | 980 mg/kg   |            |
| Ajmaline               |             |            |
| Alfacalcidol           | 0.043 mg/kg |            |
| Allopurinol            |             |            |
| Allyl alcohol          | 32 mg/kg    | 32 mg/kg   |
| Amiodarone             | 147 mg/kg   |            |
| Amitriptyline          |             |            |
| Amlodipine             | 19 mg/kg    |            |
| Amoxapine              | 313 mg/kg   |            |
| Aspirin                | 500 mg/kg   |            |
| Atorvastatin           | 300 mg/kg   | 2.5 mg/kg  |
| Azathioprine           | 160 mg/kg   |            |
| Azithromycin           | 225 mg/kg   |            |
| Bendazac               |             |            |
| Benzbromarone          |             |            |
| Benzethonium chloride  | 30 mg/kg    |            |
| Benziodarone           |             |            |
| Benzoic acid           | 1700 mg/kg  |            |
| Benzothiazyl disulfide | 2600 mg/kg  | 2600 mg/kg |
| Bisphenol A            | 610 mg/kg   | 610 mg/kg  |
| Bithionol              | 333 mg/kg   | 333 mg/kg  |
| Bromobenzene           |             |            |
| Bucetin                |             |            |
| Busulfan               | 36 mg/kg    |            |
| Caffeine               |             |            |
| Capsaicin              | 35 mg/kg    |            |
| Captopril              |             |            |
| Carboplatin            | 14 mg/kg    |            |
| Carvedilol             | 2000 mg/kg  | 2000 mg/kg |
| Catechol               | 195 mg/kg   | 195 mg/kg  |
| Celecoxib              | 400 mg/kg   |            |
| Cephalothin            |             |            |
| Cerivastatin           | 7 mg/kg     | 7 mg/kg    |
| Chlorambucil           | 4.5 mg/kg   |            |
| Chloramphenicol        |             |            |
| Chlormadinone          |             |            |
| Chlormezanone          |             |            |
| Chlorpheniramine       |             |            |
| Chlorpromazine         | 73 mg/kg    |            |
| Chlorpropamide         |             |            |
| Cholecalciferol        | 8 mg/kg     |            |
| Choline chloride       | 2550 mg/kg  |            |
| Cimetidine             |             |            |
| Ciprofloxacin          | 450 mg/kg   |            |
| Cisplatin              | 2 mg/kg     |            |
| Citalopram             | 90 mg/kg    |            |
| Citric acid            | 3000 mg/kg  |            |
| Clarithromycin         | 476 mg/kg   |            |

|                  |            |            |
|------------------|------------|------------|
| Clomiphene       | 250 mg/kg  |            |
| Clomipramine     | 115 mg/kg  |            |
| Clotrimazole     | 178 mg/kg  |            |
| Cortisone        | 206 mg/kg  | 206 mg/kg  |
| Cycloheximide    | 0.25 mg/kg |            |
| Cyclophosphamide |            |            |
| Cyclosporine A   | 350 mg/kg  |            |
| Cytarabine       | 487 mg/kg  |            |
| Danazol          | 2000 mg/kg |            |
| Dantrolene       |            |            |
| Dexamethasone    | 150 mg/kg  | 150 mg/kg  |
| Dichlorvos       | 17 mg/kg   |            |
| Diclofenac       | 10 mg/kg   | 10 mg/kg   |
| Diltiazem        |            |            |
| Dipyridamole     | 750 mg/kg  |            |
| Disopyramide     |            |            |
| Disulfiram       | 500 mg/kg  |            |
| Doxorubicin      | 3 mg/kg    | 3 mg/kg    |
| Enalapril        |            |            |
| Ergocalciferol   | 15 mg/kg   |            |
| Erythromycin     | 1500 mg/kg | 1500 mg/kg |
| Ethambutol       |            |            |
| Ethylene glycol  | 3525 mg/kg |            |
| Etodolac         | 24 mg/kg   | 24 mg/kg   |
| Etoposide        | 188 mg/kg  |            |
| Famciclovir      | 1200 mg/kg |            |
| Famotidine       |            |            |
| Finasteride      | 800 mg/kg  |            |
| Fluoxetine       | 52 mg/kg   |            |
| Fluphenazine     | 22 mg/kg   | 22 mg/kg   |
| Flutamide        |            |            |
| Fluvastatin      | 94 mg/kg   | 94 mg/kg   |
| Gentamicin       | 267 mg/kg  |            |
| Gentian violet   | 18 mg/kg   | 18 mg/kg   |
| Geraniol         | 1500 mg/kg |            |
| Glibenclamide    |            |            |
| Glimepiride      | 2500 mg/kg |            |
| Glipizide        | 2500 mg/kg |            |
| Hexachlorophene  | 8 mg/kg    | 8 mg/kg    |
| Hydrazine        | 45 mg/kg   |            |
| Hydrocortisone   | 56 mg/kg   | 56 mg/kg   |
| Hydroxyzine      |            |            |
| Ibuprofen        | 263 mg/kg  | 263 mg/kg  |
| Ifosfamide       | 143 mg/kg  | 143 mg/kg  |
| Imipramine       |            |            |
| Indomethacin     | 12 mg/kg   |            |
| Iproniazid       |            |            |
| Isoeugenol       | 1560 mg/kg | 1560 mg/kg |
| Isoprenaline     | 15 mg/kg   |            |

|                                  |            |            |
|----------------------------------|------------|------------|
| Isotretinoin                     | 125 mg/kg  |            |
| Itraconazole                     | 1093 mg/kg | 1093 mg/kg |
| Ketoconazole                     | 227 mg/kg  | 227 mg/kg  |
| Ketorolac                        | 48 mg/kg   | 48 mg/kg   |
| Labetalol                        |            |            |
| Lead(ii)acetate                  | 600 mg/kg  |            |
| Lead(iv)acetate                  | 600 mg/kg  |            |
| Levamisole                       | 120 mg/kg  |            |
| Lorazepam                        | 2000 mg/kg | 2000 mg/kg |
| Mebendazole                      | 714 mg/kg  | 714 mg/kg  |
| Mefenamic acid                   | 93 mg/kg   |            |
| Megestrol acetate                | 132 mg/kg  | 132 mg/kg  |
| Meloxicam                        | 33 mg/kg   | 33 mg/kg   |
| Mestranol                        | 250 mg/kg  | 250 mg/kg  |
| Metformin                        |            |            |
| Methimazole                      | 100 mg/kg  | 100 mg/kg  |
| Methotrexate                     | 27 mg/kg   | 0.3 mg/kg  |
| Methyl dopa                      | 325 mg/kg  |            |
| Methyltestosterone               |            |            |
| Mexiletine                       |            |            |
| Mitomycin C                      | 1.7 mg/kg  | 1.7 mg/kg  |
| Moxisylyte                       |            |            |
| N,N'-diphenyl-p-phenylenediamine | 1000 mg/kg |            |
| Naphthyl_isothiocyanate          |            |            |
| Naproxen                         | 134 mg/kg  |            |
| Nevirapine                       | 200 mg/kg  |            |
| Niacin                           | 2625 mg/kg |            |
| Niacinamide                      | 750 mg/kg  |            |
| Nicotinic acid                   |            |            |
| Nifedipine                       |            |            |
| Nimesulide                       | 162 mg/kg  |            |
| Nisoldipine                      | 1125 mg/kg |            |
| Nitrofurantoin                   | 76 mg/kg   |            |
| Nitrofurazone                    |            |            |
| Olanzapine                       | 23 mg/kg   |            |
| Omeprazole                       | 415 mg/kg  |            |
| Oxyquinoline                     | 68 mg/kg   |            |
| Papaverine                       |            |            |
| Pemoline                         | 70 mg/kg   | 70 mg/kg   |
| Penicillamine                    | 852 mg/kg  |            |
| Pergolide                        | 1.1 mg/kg  |            |
| Perhexiline                      | 320 mg/kg  |            |
| Phenacetin                       | 619 mg/kg  |            |
| Phenothiazine                    | 386 mg/kg  | 386 mg/kg  |
| Phenylanthranilic acid           |            |            |
| Phenylbutazone                   |            |            |
| Pioglitazone                     | 1500 mg/kg |            |
| Praziquantel                     | 1200 mg/kg |            |
| Primidone                        | 750 mg/kg  | 750 mg/kg  |

|                      |            |           |
|----------------------|------------|-----------|
| Procarbazine         | 54 mg/kg   | 54 mg/kg  |
| Promethazine         | 113 mg/kg  |           |
| Propylene glycol     | 2000 mg/kg |           |
| Propylthiouracil     | 625 mg/kg  | 625 mg/kg |
| Pyrazinamide         | 1500 mg/kg |           |
| Quetiapine           | 500 mg/kg  |           |
| Quinidine            |            |           |
| Rabeprazole          | 1024 mg/kg |           |
| Raloxifene           | 650 mg/kg  | 650 mg/kg |
| Ranitidine           |            |           |
| Rifabutin            | 1500 mg/kg |           |
| Rofecoxib            | 1550 mg/kg |           |
| Rosiglitazone        | 1800 mg/kg |           |
| Rotenone             |            |           |
| Roxithromycin        | 312 mg/kg  | 312 mg/kg |
| Sildenafil           | 420 mg/kg  |           |
| Sparfloxacin         | 450 mg/kg  |           |
| Streptozotocin       | 138 mg/kg  | 138 mg/kg |
| Sulindac             | 132 mg/kg  | 132 mg/kg |
| Sulpiride            |            |           |
| Tacrine              | 24 mg/kg   |           |
| Terbinafine          | 2000 mg/kg |           |
| Tetracycline         | 1500 mg/kg |           |
| Theophylline         |            |           |
| Thioridazine         |            |           |
| Ticlopidine          | 223 mg/kg  |           |
| Tocainide            | 224 mg/kg  |           |
| Tolazamide           | 1500 mg/kg |           |
| Tolbutamide          |            |           |
| Tretinoin            | 7 mg/kg    |           |
| Triazolam            |            |           |
| Trichloroacetic acid | 474 mg/kg  | 474 mg/kg |
| Trimethadione        |            |           |
| Troglitazone         | 1200 mg/kg |           |
| Venlafaxine          | 320 mg/kg  |           |
| Vinblastine          | 0.3 mg/kg  | 0.3 mg/kg |
| Vinorelbine          | 1.5 mg/kg  | 1.5 mg/kg |
| Zidovudine           | 1540 mg/kg |           |

---

| GSE8858    | TG-GATEs   | Class |
|------------|------------|-------|
| 2000mg/kg  |            | NGHC  |
| 0.02 mg/kg |            | NGHC  |
| 400 mg/kg  |            | NGHC  |
| 1500mg/kg  |            | NGHC  |
| 617mg/kg   |            | NGHC  |
| 1000 mg/kg |            | NGHC  |
| 895 mg/kg  |            | NGHC  |
| 400 mg/kg  |            | NGHC  |
|            | 300 mg/kg  | NGHC  |
| 600 mg/kg  |            | NGHC  |
| 500 mg/kg  | 300 mg/kg  | NGHC  |
|            | 150 mg/kg  | NGHC  |
| 1636mg/kg  |            | NGHC  |
| 313 mg/kg  |            | NGHC  |
| 1480 mg/kg | 10 mg/kg   | NGHC  |
|            | 250 mg/kg  | NGHC  |
| 1500 mg/kg |            | NGHC  |
| 390 mg/kg  |            | NGHC  |
| 375 mg/kg  |            | NGHC  |
|            | 1000 mg/kg | NGHC  |
| 394 mg/kg  |            | NGHC  |
| 700 mg/kg  | 300 mg/kg  | NGHC  |
|            | 2000 mg/kg | NGHC  |
| 1500 mg/kg |            | NGHC  |
| 100 mg/kg  | 100 mg/kg  | NGHC  |
| 300 mg/kg  |            | NGHC  |
|            | 30 mg/kg   | NGHC  |
| 338 mg/kg  |            | NGHC  |
| 375 mg/kg  |            | NGHC  |
|            |            | NGHC  |
| 1500 mg/kg |            | NGHC  |
| 1170 mg/kg |            | NGHC  |
| 70 mg/kg   |            | NGHC  |
| 80 mg/kg   | 300 mg/kg  | NGHC  |
|            |            | NGHC  |
| 1200 mg/kg |            | NGHC  |
| 184 mg/kg  |            | NGHC  |
| 164 mg/kg  |            | NGHC  |
| 488 mg/kg  |            | NGHC  |
| 300 mg/kg  |            | NGHC  |
| 150 mg/kg  |            | NGHC  |
| 375 mg/kg  |            | NGHC  |
| 200 mg/kg  | 45 mg/kg   | NGHC  |
| 600 mg/kg  |            | NHC   |
| 300 mg/kg  |            | NHC   |
| 25 mg/kg   |            | NHC   |
|            | 1000 mg/kg | NHC   |

|             |            |     |
|-------------|------------|-----|
| 250 mg/kg   | 600 mg/kg  | NHC |
| 980 mg/kg   |            | NHC |
|             | 300 mg/kg  | NHC |
| 0.043 mg/kg |            | NHC |
|             | 150 mg/kg  | NHC |
|             | 30 mg/kg   | NHC |
| 147 mg/kg   | 2000 mg/kg | NHC |
|             | 150 mg/kg  | NHC |
| 19 mg/kg    |            | NHC |
| 313 mg/kg   |            | NHC |
| 500 mg/kg   | 2000 mg/kg | NHC |
| 300 mg/kg   |            | NHC |
| 160 mg/kg   | 30 mg/kg   | NHC |
| 225 mg/kg   |            | NHC |
|             | 1000 mg/kg | NHC |
|             | 200 mg/kg  | NHC |
|             |            | NHC |
|             | 300 mg/kg  | NHC |
|             |            | NHC |
|             |            | NHC |
|             |            | NHC |
| 333 mg/kg   |            | NHC |
|             | 300 mg/kg  | NHC |
|             | 2000 mg/kg | NHC |
| 36 mg/kg    |            | NHC |
|             | 100 mg/kg  | NHC |
| 35 mg/kg    |            | NHC |
|             | 1000 mg/kg | NHC |
| 14 mg/kg    | 100 mg/kg  | NHC |
| 2000 mg/kg  |            | NHC |
| 195 mg/kg   |            | NHC |
| 400 mg/kg   |            | NHC |
|             | 2000 mg/kg | NHC |
| 7 mg/kg     |            | NHC |
| 4.5 mg/kg   |            | NHC |
|             | 1000 mg/kg | NHC |
|             | 2000 mg/kg | NHC |
|             | 500 mg/kg  | NHC |
|             | 30 mg/kg   | NHC |
| 73 mg/kg    |            | NHC |
|             | 300 mg/kg  | NHC |
| 8 mg/kg     |            | NHC |
|             |            | NHC |
|             | 1000 mg/kg | NHC |
| 450 mg/kg   | 1000 mg/kg | NHC |
| 2 mg/kg     | 3 mg/kg    | NHC |
| 90 mg/kg    |            | NHC |
|             |            | NHC |
| 476 mg/kg   |            | NHC |

|            |            |     |
|------------|------------|-----|
| 250 mg/kg  |            | NHC |
| 115 mg/kg  | 100 mg/kg  | NHC |
| 178 mg/kg  |            | NHC |
| 206 mg/kg  |            | NHC |
| 0.25 mg/kg |            | NHC |
|            | 150 mg/kg  | NHC |
|            | 300 mg/kg  | NHC |
| 487 mg/kg  |            | NHC |
| 2000 mg/kg | 2000 mg/kg | NHC |
|            | 250 mg/kg  | NHC |
| 150 mg/kg  |            | NHC |
| 17 mg/kg   |            | NHC |
| 10 mg/kg   | 100 mg/kg  | NHC |
|            | 800 mg/kg  | NHC |
| 750 mg/kg  |            | NHC |
|            | 400 mg/kg  | NHC |
| 500 mg/kg  | 600 mg/kg  | NHC |
| 3 mg/kg    | 10 mg/kg   | NHC |
|            | 600 mg/kg  | NHC |
| 15 mg/kg   |            | NHC |
| 1500 mg/kg | 1000 mg/kg | NHC |
|            | 1000 mg/kg | NHC |
|            |            | NHC |
| 24 mg/kg   |            | NHC |
| 188 mg/kg  | 1000 mg/kg | NHC |
| 1200 mg/kg |            | NHC |
|            | 1000 mg/kg | NHC |
| 800 mg/kg  |            | NHC |
| 52 mg/kg   | 30 mg/kg   | NHC |
| 22 mg/kg   | 20 mg/kg   | NHC |
|            | 150 mg/kg  | NHC |
| 94 mg/kg   |            | NHC |
| 267 mg/kg  | 100 mg/kg  | NHC |
|            |            | NHC |
| 1500 mg/kg |            | NHC |
|            | 1000 mg/kg | NHC |
| 2500 mg/kg |            | NHC |
| 2500 mg/kg |            | NHC |
| 8 mg/kg    |            | NHC |
| 45 mg/kg   |            | NHC |
| 56 mg/kg   |            | NHC |
|            | 100 mg/kg  | NHC |
| 275mg/kg   | 400 mg/kg  | NHC |
| 143 mg/kg  |            | NHC |
|            | 100 mg/kg  | NHC |
| 12 mg/kg   | 50 mg/kg   | NHC |
|            | 60 mg/kg   | NHC |
| 1560 mg/kg |            | NHC |
| 15 mg/kg   |            | NHC |



|            |            |     |
|------------|------------|-----|
| 125 mg/kg  |            | NHC |
| 1093 mg/kg |            | NHC |
| 227 mg/kg  | 100 mg/kg  | NHC |
| 48 mg/kg   |            | NHC |
|            | 450 mg/kg  | NHC |
|            |            | NHC |
|            |            | NHC |
| 120 mg/kg  |            | NHC |
| 2000 mg/kg |            | NHC |
| 714 mg/kg  |            | NHC |
|            | 300 mg/kg  | NHC |
|            |            | NHC |
| 33 mg/kg   | 100 mg/kg  | NHC |
| 250 mg/kg  |            | NHC |
|            | 1000 mg/kg | NHC |
| 100 mg/kg  | 100 mg/kg  | NHC |
| 27 mg/kg   |            | NHC |
| 325 mg/kg  | 600 mg/kg  | NHC |
|            | 300 mg/kg  | NHC |
|            | 400 mg/kg  | NHC |
|            |            | NHC |
|            | 500 mg/kg  | NHC |
| 1000 mg/kg |            | NHC |
|            | 150 mg/kg  | NHC |
| 134 mg/kg  | 200 mg/kg  | NHC |
| 200 mg/kg  |            | NHC |
| 2625 mg/kg |            | NHC |
| 750 mg/kg  |            | NHC |
|            | 1000 mg/kg | NHC |
|            | 1000 mg/kg | NHC |
| 162 mg/kg  | 300 mg/kg  | NHC |
| 1125 mg/kg |            | NHC |
| 76 mg/kg   | 600 mg/kg  | NHC |
|            | 300 mg/kg  | NHC |
|            |            | NHC |
| 23 mg/kg   |            | NHC |
| 415 mg/kg  | 1000 mg/kg | NHC |
| 68 mg/kg   |            | NHC |
|            | 400 mg/kg  | NHC |
|            | 75 mg/kg   | NHC |
| 70 mg/kg   |            | NHC |
| 852 mg/kg  | 1000 mg/kg | NHC |
| 1.1 mg/kg  |            | NHC |
| 320 mg/kg  | 150 mg/kg  | NHC |
| 619 mg/kg  | 2000 mg/kg | NHC |
| 386 mg/kg  |            | NHC |
|            | 2000 mg/kg | NHC |
|            | 200 mg/kg  | NHC |
| 1500 mg/kg |            | NHC |
| 1200 mg/kg |            | NHC |
| 750 mg/kg  |            | NHC |

|            |            |     |
|------------|------------|-----|
| 54 mg/kg   |            | NHC |
| 113 mg/kg  | 200 mg/kg  | NHC |
|            |            | NHC |
| 625 mg/kg  | 100 mg/kg  | NHC |
| 1500 mg/kg |            | NHC |
| 500 mg/kg  |            | NHC |
|            | 200 mg/kg  | NHC |
| 1024 mg/kg |            | NHC |
| 650 mg/kg  |            | NHC |
|            | 1000 mg/kg | NHC |
| 1500 mg/kg |            | NHC |
| 1550 mg/kg |            | NHC |
| 1800 mg/kg | 500 mg/kg  | NHC |
|            | 50 mg/kg   | NHC |
| 312 mg/kg  |            | NHC |
| 420 mg/kg  |            | NHC |
| 450 mg/kg  |            | NHC |
| 138 mg/kg  |            | NHC |
| 132 mg/kg  | 150 mg/kg  | NHC |
|            | 2000 mg/kg | NHC |
| 24 mg/kg   | 30 mg/kg   | NHC |
| 2000 mg/kg | 750 mg/kg  | NHC |
| 1500 mg/kg | 1000 mg/kg | NHC |
|            | 200 mg/kg  | NHC |
|            | 100 mg/kg  | NHC |
| 223 mg/kg  | 1000 mg/kg | NHC |
| 224 mg/kg  |            | NHC |
| 1500 mg/kg |            | NHC |
|            | 1000 mg/kg | NHC |
| 7 mg/kg    |            | NHC |
|            | 1000 mg/kg | NHC |
|            |            | NHC |
|            | 500 mg/kg  | NHC |
| 1200 mg/kg |            | NHC |
| 320 mg/kg  |            | NHC |
| 0.3 mg/kg  |            | NHC |
| 1.5 mg/kg  |            | NHC |
| 1540 mg/kg |            | NHC |

---
